# Supplementary material for: Early patterning followed by tissue growth establishes distal identity in Drosophila Malpighian tubules
Source: PubMed Central journal article supplement (PMC9437309; doi:10.3389/fcell.2022.947376), 2022-08-19
Supplement: Image1.pdf [file Image1.pdf]

*Supplementary material*

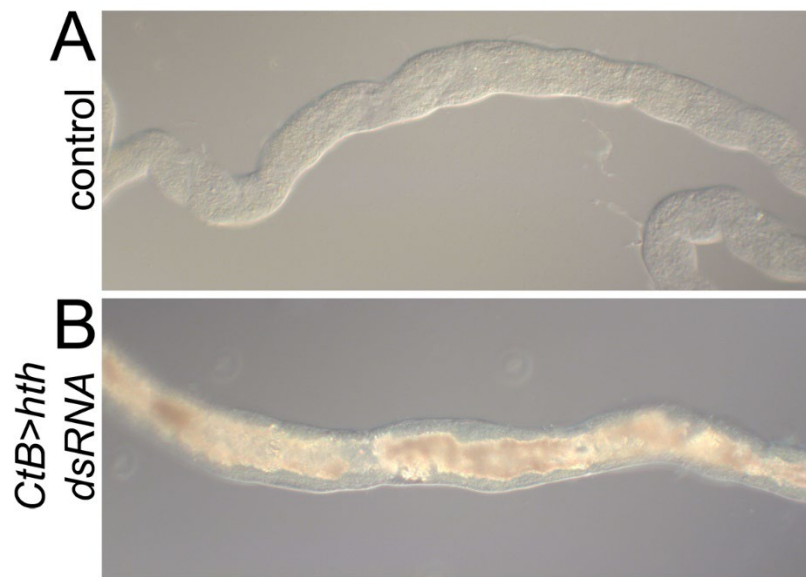

**Figure S1. Excessive uric acid accumulates in adult Malpighian tubules following *homothorax* knockdown. (A) Section of a control (OrR) adult MpT. (B) Section of a *hth* RNAi (*CtB>hth dsRNA*) adult MpT.**

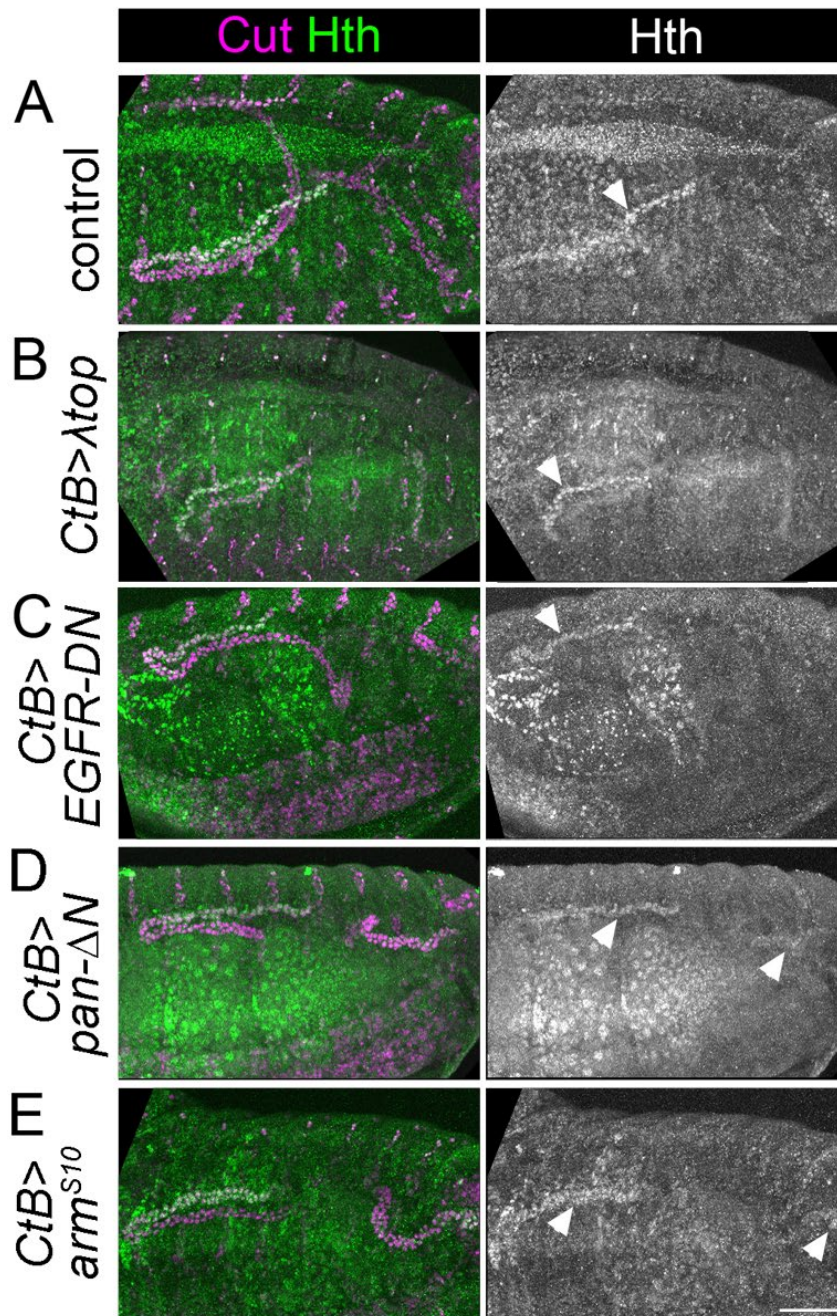

**Figure S2. EGF or Wg pathway activity do not appear to pattern the distal Malpighian tubule.** (A-E) ~Stage 16 embryos stained to show MpT nuclei (anti-Cut) and the nuclei of cells from the distal MpT segment (anti-Hth, arrowheads). In each example at least one of the pair of anterior MpTs is clearly visible. (A) Control (*w<sup>1118</sup>*) embryo. (B) *CtB-Gal4>UAS-λtop* embryo. (C) *CtB-Gal4>UAS-EGFR-DN* embryo. (D) *CtB-Gal4>UAS-pan/dTCFΔN* embryo. (E) *CtB>UAS-arm<sup>S10</sup>* embryo. Scale bar = 50μm.

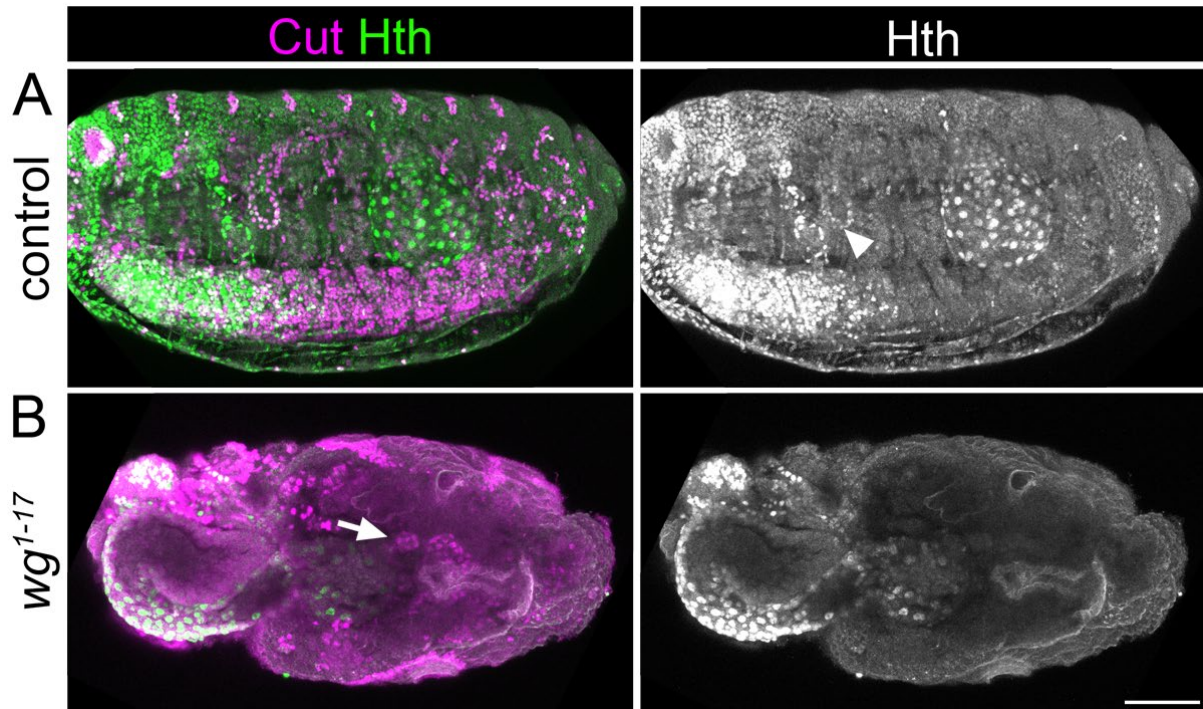

**Figure S3. Wingless is required for expression of distal tubule markers.** ~Stage 16 embryos stained to show MpT nuclei (anti-Cut) and the nuclei of cells from the distal MpT segment (anti-Hth, arrowhead). Arrow indicates MpT, where anti-Hth staining is absent. **(A)** Control embryo ( $wg^{1-17/+}$  or  $+/+$ ). **(B)** Homozygous  $wg^{1-17}$  embryo. Scale bar = 50 $\mu$ m.

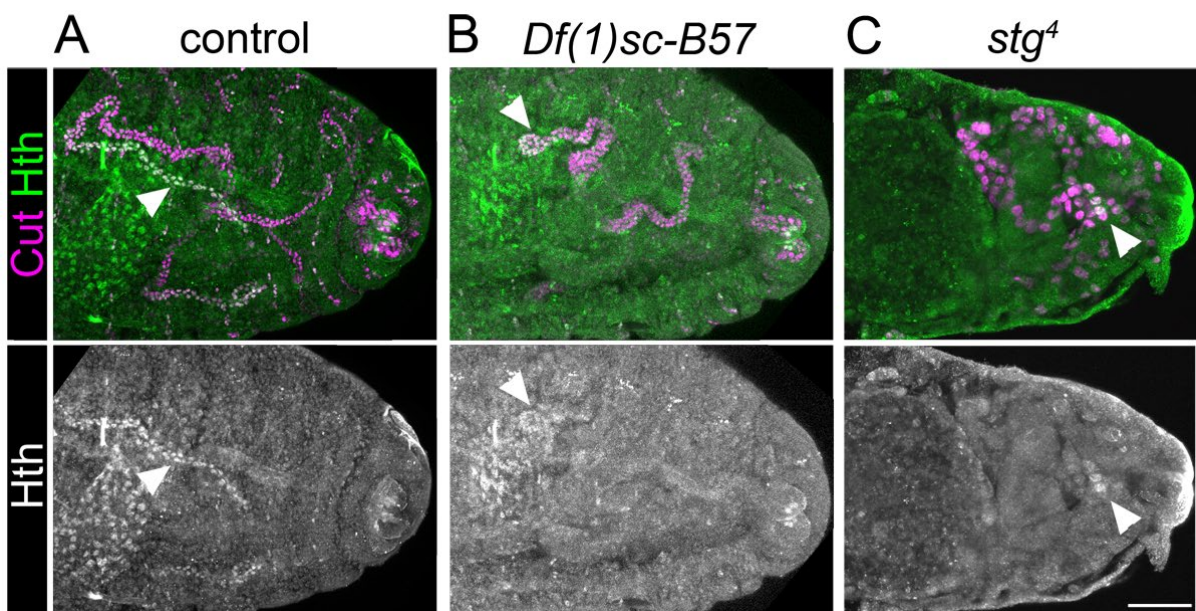

**Figure S4. achaete-scute complex genes are not required to specify distal tubule identity, but are required to expand the pool of distal identity cells.** ~Stage 16 embryos stained to show the nuclei of the MpT cells (anti-Cut) and nuclei from the distal MpT cells

(anti-Hth, arrowheads). **(A)** Control ( $w^{1118}$ ) embryo (same embryo as Fig. 2D). **(B)** Homozygous *Df(1)sc-B57* embryo. **(C)** Homozygous *stg*<sup>4</sup> embryo. Scale bar = 50 $\mu$ m.

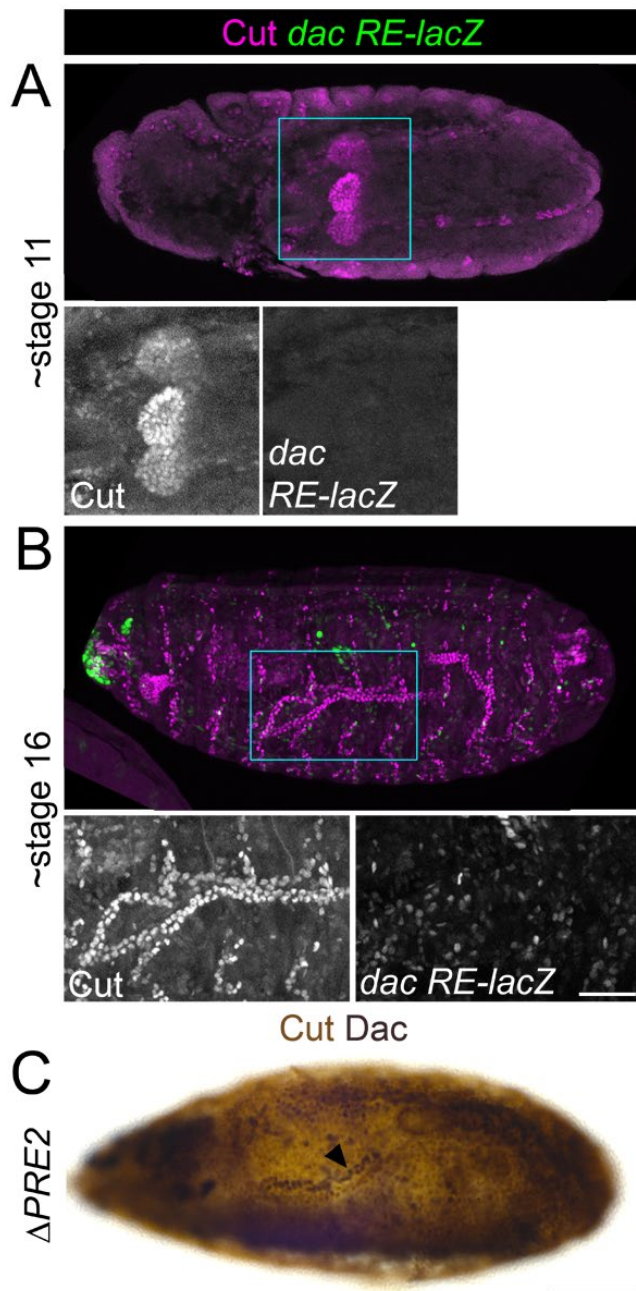

**Figure S5. *dac RE* and *dac PRE2* enhancers do not regulate Dachshund expression in the developing Malpighian tubules.** (A-B) *dac RE-lacZ* embryos stained with anti- $\beta$ -galactosidase, along with anti-Cut to mark the MpT nuclei. This *dac* enhancer is characterised as driving expression in the leg disc, and contains putative dTCF/Pan binding sites (Giorgianni and Mann, 2011). Single channel images equate to region in blue box of merged image. (A) ~stage 11. (B) ~stage 16. (C) ~Stage 16 homozygous mutant embryo lacking the *PRE2* regulatory region of *dac* ( $\Delta$ PRE2) stained to show MpT nuclei (anti-Cut)

and the nuclei of cells from the distal MpT segment (anti-Dac, arrowhead). *PRE2* is a Polycomb response element which has been characterised as a regulatory region for *dac* during leg development (Ogiyama et al., 2018). We were interested in this site as ChIP-on-chip from *Drosophila* embryos showed it to contain a dTCF/Pan binding site (Junion et al., 2012). Scale bar = 50 $\mu$ m.
